# Supplementary material for: Migraine and tension type headache in adolescents at grammar school in Germany – burden of disease and health care utilization
Source: PubMed Central journal article supplement (PMC4467810; doi:10.1186/s10194-015-0534-4), 2015-06-04
Supplement: 10194_2015_534_MOESM2_ESM.pdf [file 10194_2015_534_MOESM2_ESM.pdf]

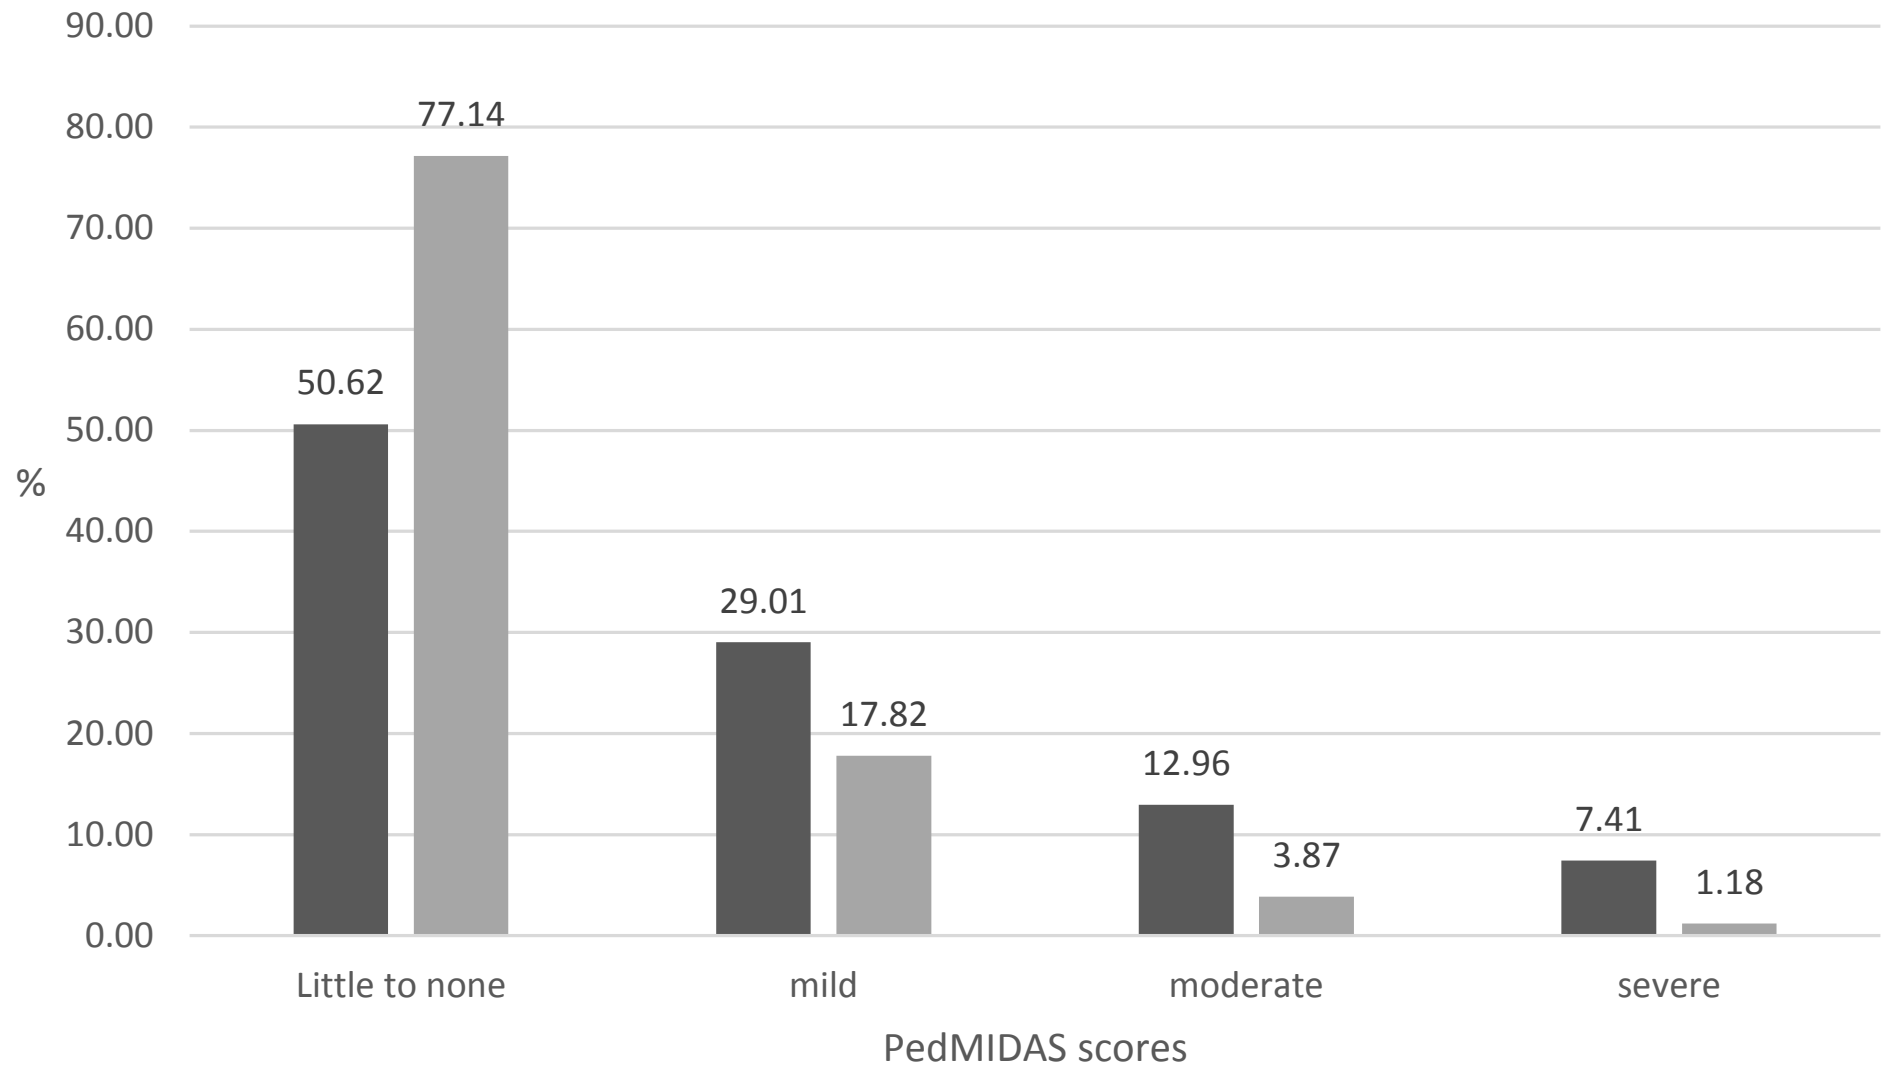

■ Students, who consulted a physician (N=162)

■ Students, who did not consult a physician (N=1190)
